# Supplementary material for: Formation Mechanisms and Phase Stability of Solid-State Grown CsPbI3 Perovskites
Source: MDPI journal article supplement (doi:10.3390/nano11071823), 2021-07-14
Supplement: s1 [file s1]

# Supplementary Materials

## Formation Mechanisms and Phase Stability of Solid-State Grown CsPbI<sub>3</sub> Perovskites

Jessica Satta <sup>1</sup>, Alberto Casu <sup>2</sup>, Daniele Chiriu <sup>1</sup>, Carlo Maria Carbonaro <sup>1</sup>, Luigi Stagi <sup>3</sup> and Pier Carlo Ricci <sup>1,\*</sup>

<sup>1</sup> Department of Physics, University of Cagliari, Campus of Monserrato, 09042 Monserrato, Italy; jessica.satta@dsf.unica.it (J.S.); danielle.chiriu@dsf.unica.it (D.C.); cm.carbonaro@dsf.unica.it (C.M.G.)

<sup>2</sup> Biological and Environmental Sciences and Engineering (BESE) Division, King Abdullah University of Science and Technology (KAUST), Nabla Lab, Thuwal 23955-6900, Saudi Arabia; alberto.casu@kaust.edu.sa

<sup>3</sup> Laboratory of Materials Science and Nanotechnology, CR-INSTM, Department of Chemistry and Pharmacy, University of Sassari, Via Vienna 2, 07100 Sassari, Italy; lstagi@uniss.it

\* Correspondence: carlo.ricci@dsf.unica.it

### Gaussian fit of luminescence peaks

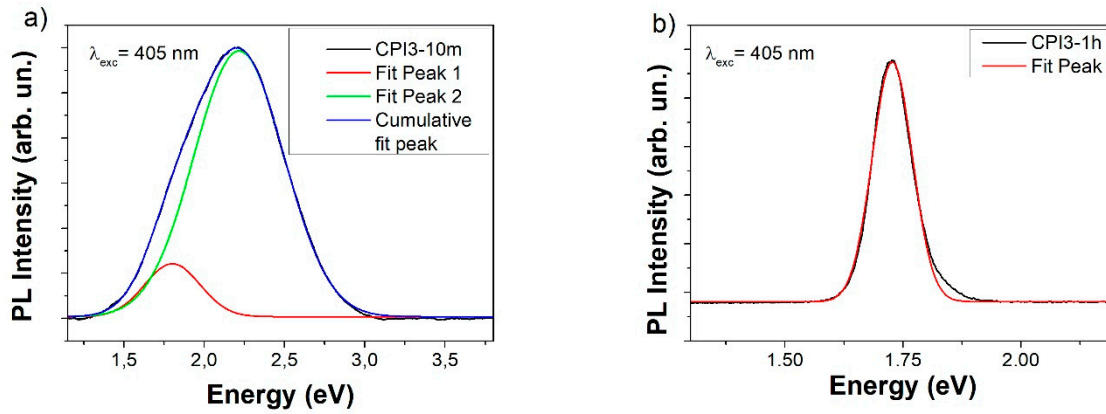

**Figure S1.** Gaussian Fit of the luminescence spectra collected on the samples a) CPI3-10m and b) CPI3-1h.

Figure S1 reports the gaussian fit of the two luminescence peaks. The broad emission of the d-CsPbI<sub>3</sub> is the convolution of two gaussian peaks:

$$I = I_0 + A_1 e^{-\frac{(x-x_{c1})^2}{2w_1^2}} + A_2 e^{-\frac{(x-x_{c2})^2}{2w_2^2}}$$

with  $A$  amplitude,  $x_c$  the centre and  $w$  the width of the peak.

Retrieved parameters are reported in Table S1.

**Table S1.** Fit parameters of PL spectrum in figure S1a.

|               | $A_i$           | $x_c$ (eV)        | $w$ (eV)          | FWHM (eV)         |
|---------------|-----------------|-------------------|-------------------|-------------------|
| <b>Peak 1</b> | $59 \pm 3$      | $1.802 \pm 0.004$ | $0.172 \pm 0.003$ | $0.406 \pm 0.008$ |
| <b>Peak 2</b> | $294.5 \pm 0.9$ | $2.216 \pm 0.003$ | $0.280 \pm 0.002$ | $0.659 \pm 0.004$ |

The narrow emission around 715 nm can be fitted with a single gaussian peak:

$$I = I_0 + A e^{-\frac{(x-x_c)^2}{2w^2}},$$

Retrieved parameters are reported in Table S2.

**Table S2.** Fit parameters of PL spectrum in figure S1b.

|               | $A_i$        | $x_c$ (eV)            | $w$ (eV)              | FWHM (eV)           |
|---------------|--------------|-----------------------|-----------------------|---------------------|
| <b>Peak 1</b> | $4939 \pm 9$ | $1.72734 \pm 0.00009$ | $0.04240 \pm 0.00009$ | $0.0998 \pm 0.0002$ |

## Steady state luminescence

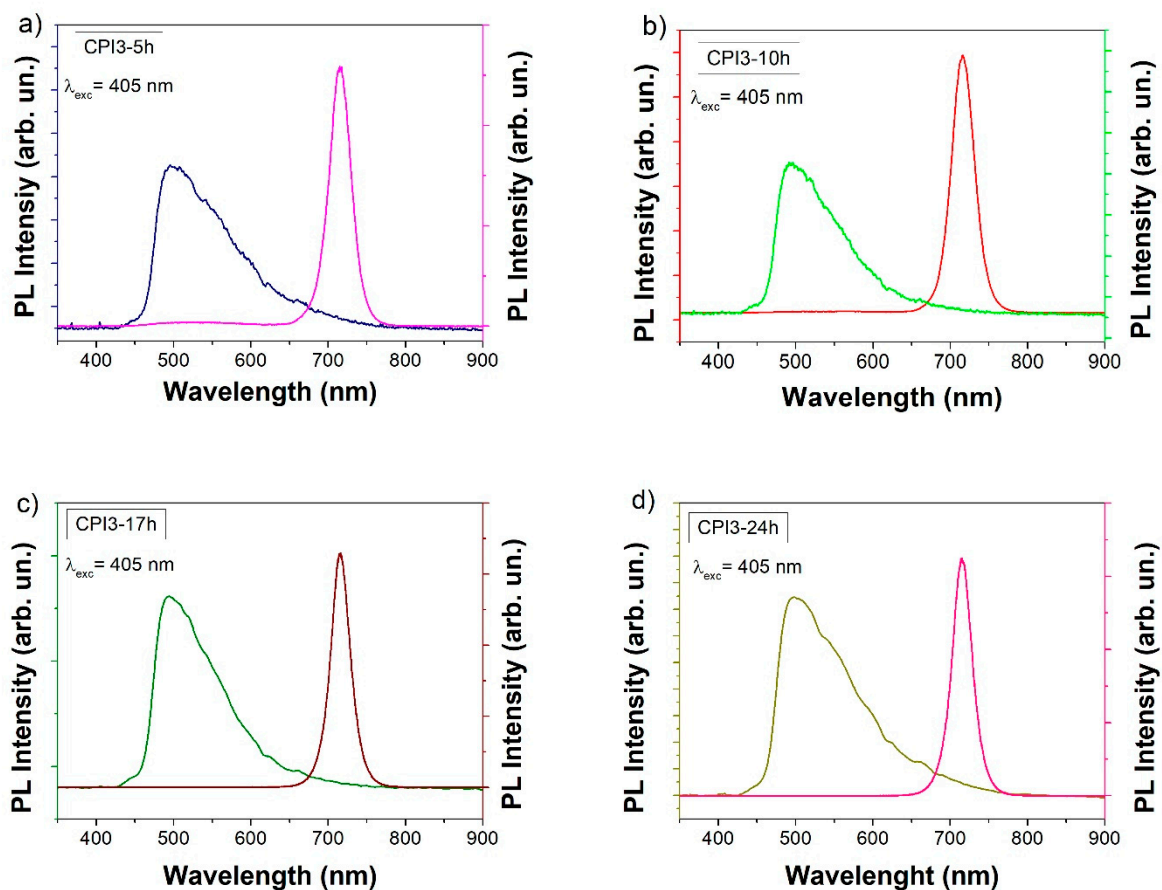

**Figure S2.** Steady-state luminescence spectra of two different points on the samples a) CPI3-5h, b) CPI3-10h, c) CPI3-17h and d) CPI3-24h.

Figure S2 shows steady-state luminescence spectra collected on different points of the samples CPI3-5h, CPI3-10h, CPI3-17h and CPI3-24h. The graphs confirm the inhomogeneity of the samples, showing that the luminescence is point-dependent. It's possible to observe a broad peak around 550 nm and a narrow one around 715 nm.

## Excitation spectra for the peak at 715 nm

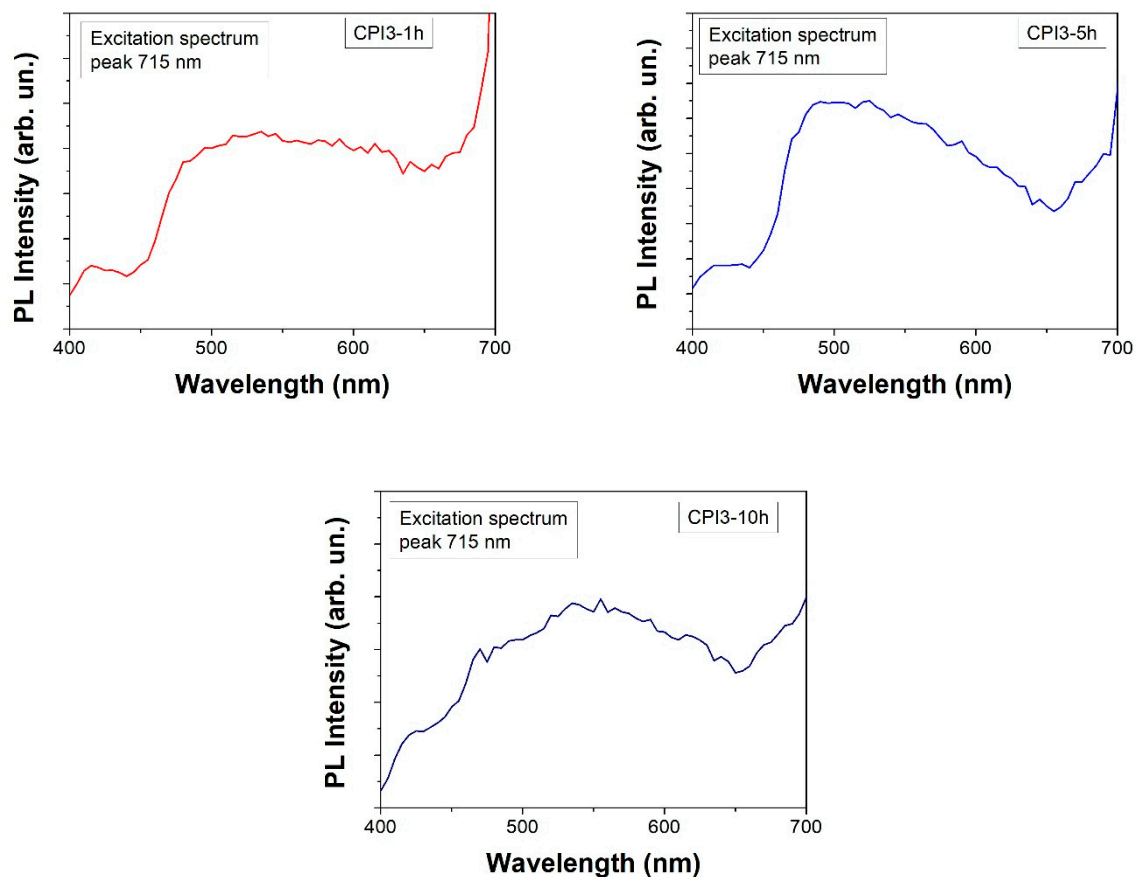

**Figure S3.** PL Excitation spectra of the emission at 715 nm on the samples a) CPI3-1h, b) CPI3-5h and c) CPI3-10h.

Figure S3 shows the PL Excitation spectra of the emission at 715 nm of the samples CPI3-1h, CPI3-5h and CPI3-10h. The spectra have been extrapolated from the 3D maps in Figure 8.
